# Supplementary material
Source: publisher site journal article supplement (https://www.dovepress.com/article/394790)
Supplement: Supplementary file 1 [file get_supplementary_file.php]

**Supplementary Table**

**Table S1 Preventive measures/behaviors of COVID-19 in DM patients and healthy control**

| Items | All | Healthy | Diabetes | *P* |
| --- | --- | --- | --- | --- |
| 1. When I meet my friends and colleagues, I will always greet them with a handshakea |  |  |  | <0.0001 |
| Strongly agree | 6(1.95) | 5(3.01) | 1(0.71) |  |
| Agree | 40(13.03) | 23(13.86) | 17(12.06) |  |
| Neither disagree nor agree | 97(31.60) | 64(38.55) | 33(23.40) |  |
| disagree | 128(41.69) | 50(30.12) | 78(55.32) |  |
| Strongly disagree | 36(11.73) | 24(14.46) | 12(8.51) |  |
| 2. When I meet my friends and colleagues, I will always greet them with a huga |  |  |  | <0.0001 |
| Strongly agree | 4(1.30) | 4(2.41) | (0.00) |  |
| Agree | 7(2.28) | 6(3.61) | 1(0.71) |  |
| Neither disagree nor agree | 66(21.50) | 46(27.71) | 20(14.18) |  |
| disagree | 184(59.93) | 82(49.40) | 102(72.34) |  |
| Strongly disagree | 46(14.98) | 28(16.87) | 18(12.77) |  |
| 3. I wash my hands regularly and for enough period of timea |  |  |  | <0.0001 |
| Strongly agree | 98(31.92) | 79(47.59) | 19(13.48) |  |
| Agree | 121(39.41) | 86(51.81) | 35(24.82) |  |
| Neither disagree nor agree | 43(14.01) | 1(0.60) | 42(29.79) |  |
| disagree | 43(14.01) | 0(0.00) | 43(30.50) |  |
| Strongly disagree | 2(0.65) | 0(0.00) | 2(1.42) |  |
| 4. I usually put a facemask to protect myself from the risk of infectiona |  |  |  | 0.059 |
| Strongly agree | 145(47.23) | 79(47.59) | 66(46.81) |  |
| Agree | 142(46.25) | 80(48.19) | 62(43.97) |  |
| Neither disagree nor agree | 14(4.56) | 7(4.22) | 7(4.96) |  |
| disagree | 6(1.95) | 0(0.00) | 6(4.26) |  |
| Strongly disagree | 0(0.00) | 0(0.00) | (0.00) |  |
| 5. If I find that I contacted a person infected with the virus, I will inform the health authoritiesa |  |  |  | <0.0001 |
| Strongly agree | 156(50.81) | 110(66.27) | 46(32.62) |  |
| Agree | 122(39.74) | 53(31.93) | 69(48.94) |  |
| Neither disagree nor agree | 26(8.47) | 3(1.81) | 23(16.31) |  |
| Disagree | 3(0.98) | 0(0.00) | 3(2.13) |  |
| Strongly disagree | 0(0.00) | 0(0.00) | 0(0.00) |  |
| 6. If I have any of the symptoms associated with the disease, I will inform the health authoritiesa |  |  |  | <0.0001 |
| Strongly agree | 131(42.67) | 92(55.42) | 39(27.66) |  |
| Agree | 130(42.35) | 64(38.55) | 66(46.81) |  |
| Neither disagree nor agree | 43(14.01) | 10(6.02) | 33(23.40) |  |
| disagree | 3(0.98) | 0(0.00) | 3(2.13) |  |
| Strongly disagree | 0(0.00) | 0(0.00) | 0(0.00) |  |
| 7. If I find that I contacted a person infected with the virus, I agree to be isolated at home for a certain period of time until it is proven that I am free from the diseasea |  |  |  | <0.0001 |
| Strongly agree | 153(49.84) | 100(60.24) | 53(37.59) |  |
| Agree | 133(43.32) | 58(34.94) | 75(53.19) |  |
| Neither disagree nor agree | 13(4.23) | 3(1.81) | 10(7.09) |  |
| disagree | 6(1.95) | 3(1.81) | 3(2.13) |  |
| Strongly disagree | 2(0.65) | 2(1.20) | 0(0.00) |  |
| 8. If I found that I contacted a person infected with the virus, I agree to be isolated at an isolation hospital for a certain period of time until it is proven that I am free from the diseasea |  |  |  | <0.0001 |
| Strongly agree | 155(50.49) | 101(60.84) | 54(38.30) |  |
| Agree | 133(43.32) | 58(34.94) | 75(53.19) |  |
| Neither disagree nor agree | 16(5.21) | 7(4.22) | 9(6.38) |  |
| disagree | 3(0.98) | 0(0.00) | 3(2.13) |  |
| Strongly disagree | 0(0.00) | 0(0.00) | 0(0.00) |  |
| 9. If I am asked to be isolated for a certain period of time, I think my salary will continued during this perioda |  |  |  | <0.0001 |
| Strongly agree | 57(18.57) | 50(30.12) | 7(4.96) |  |
| Agree | 129(42.02) | 68(40.96) | 61(43.26) |  |
| Neither disagree nor agree | 56(18.24) | 31(18.67) | 25(17.73) |  |
| Disagree | 56(18.24) | 12(7.23) | 44(31.21) |  |
| Strongly disagree | 9(2.93) | 5(3.01) | 4(2.84) |  |
| 10. If I am asked to be isolated for a certain period of time, my salary should be continued during this perioda |  |  |  | <0.0001 |
| Strongly agree | 64(20.85) | 50(30.12) | 14(9.93) |  |
| Agree | 173(56.35) | 73(43.98) | 100(70.92) |  |
| Neither disagree nor agree | 49(15.96) | 30(18.07) | 19(13.48) |  |
| Disagree | 18(5.86) | 11(6.63) | 7(4.96) |  |
| Strongly disagree | 3(0.98) | 2(1.20) | 1(0.71) |  |
| 11. If there is an available lab test for detection of the virus, I am willing to do it |  |  |  | <0.0001 |
| Strongly agreea | 200(65.15) | 85(51.20) | 115(81.56) |  |
| Agree | 101(32.90) | 75(45.18) | 26(18.44) |  |
| Neither disagree nor agree | 6(1.95) | 6(3.61) | 0(0.00) |  |
| Disagree | 0(0.00) | 0(0.00) | 0(0.00) |  |
| Strongly disagree | 0(0.00) | 0(0.00) | 0(0.00) |  |
| 12. If there is an available vaccine for the virus, I am willing to get ita |  |  |  | <0.0001 |
| Strongly agree | 130(42.35) | 82(49.40) | 48(34.04) |  |
| Agree | 116(37.79) | 78(46.99) | 38(26.95) |  |
| Neither disagree nor agree | 17(5.54) | 6(3.61) | 11(7.80) |  |
| Disagree | 38(12.38) | 0(0.00) | 38(26.95) |  |
| Strongly disagree | 6(1.95) | 0(0.00) | 6(4.26) |  |
| 13. I usually follow the updates about the spread of the virus in my countrya |  |  |  | <0.0001 |
| Strongly agree | 91(29.64) | 73(43.98) | 18(12.77) |  |
| Agree | 148(48.21) | 87(52.41) | 61(43.26) |  |
| Neither disagree nor agree | 48(15.64) | 6(3.61) | 42(29.79) |  |
| Disagree | 14(4.56) | 0(0.00) | 14(9.93) |  |
| Strongly disagree | 6(1.95) | 0(0.00) | 6(4.26) |  |
| 14. I usually follow the updates about the spread of the virus worldwidea |  |  |  | <0.0001 |
| Strongly agree | 92(29.97) | 73(43.98) | 19(13.48) |  |
| Agree | 140(45.60) | 86(51.81) | 54(38.30) |  |
| Neither disagree nor agree | 53(17.26) | 7(4.22) | 46(32.62) |  |
| Disagree | 16(5.21) | 0(0.00) | 16(11.35) |  |
| Strongly disagree | 6(1.95) | 0(0.00) | 6(4.26) |  |
| 15. If a lecture about the virus is organized near me, I will attend ita |  |  |  | <0.0001 |
| Strongly agree | 61(19.87) | 51(30.72) | 10(7.09) |  |
| Agree | 107(34.85) | 78(46.99) | 29(20.57) |  |
| Neither disagree nor agree | 124(40.39) | 36(21.69) | 88(62.41) |  |
| Disagree | 15(4.89) | 1(0.60) | 14(9.93) |  |
| Strongly disagree | 0(0.00) | 0(0.00) | 0(0.00) |  |
| 16. If flyers or brochures that include information about the disease are distributed, I will read them and follow the instructions mentioned in thema |  |  |  | <0.0001 |
| Strongly agree | 99(32.25) | 65(39.16) | 34(24.11) |  |
| Agree | 157(51.14) | 91(54.82) | 66(46.81) |  |
| Neither disagree nor agree | 42(13.68) | 10(6.02) | 32(22.70) |  |
| Disagree | 9(2.93) | 0(0.00) | 9(6.38) |  |
| Strongly disagree | 0(0.00) | 0(0.00) | 0(0.00) |  |

**Notes:** a number (percentage)

**Table S2 Knowledge of COVID-19 vaccination in DM patients and healthy control**

| Items | All | Healthy | Diabetes | P |
| --- | --- | --- | --- | --- |
| Total score of DrVac-COVID19Sc | 66.57(9.78) | 69.94(8.99) | 62.6(9.20) | <0.0001 |
| Valueb | 18(17.00) | 18.5(18.00) | 18(16.00) | <0.0001 |
| Impactsb | 17(14.00) | 17(14.00) | 18(15.00) | 0.468 |
| Knowledgeb | 15(11.00) | 17(14.75) | 10(8.50) | <0.0001 |
| autonomy traitsb | 18(16.00) | 19(16.00) | 18(17.00) | 0.009 |
| 1. Vaccination is a very effective way to protect me against COVID-19.a |  |  |  | 0.505 |
| Strongly disagree | 1(0.33) | 1(0.60) | 0(0.00) |  |
| Disagree | 1(0.33) | 1(0.60) | 0(0.00) |  |
| Slightly disagree | 8(2.61) | 5(3.01) | 3(2.13) |  |
| Neither disagree nor agree | 55(17.92) | 29(17.47) | 26(18.44) |  |
| Slightly agree | 28(9.12) | 12(7.23) | 16(11.35) |  |
| Agree | 132(43.00) | 68(40.96) | 64(45.39) |  |
| Strongly agree | 82(26.71) | 50(30.12) | 32(22.70) |  |
| 2. I know very well how vaccination protects me from COVID-19.a |  |  |  | <0.0001 |
| Strongly disagree | 61(19.87) | 0(0.00) | 61(43.26) |  |
| Disagree | 28(9.12) | 1(0.60) | 27(19.15) |  |
| Slightly disagree | 10(3.26) | 4(2.41) | 6(4.26) |  |
| Neither disagree nor agree | 38(12.38) | 30(18.07) | 8(5.67) |  |
| Slightly agree | 20(6.51) | 10(6.02) | 10(7.09) |  |
| Agree | 78(25.41) | 62(37.35) | 16(11.35) |  |
| Strongly agree | 72(23.45) | 59(35.54) | 13(9.22) |  |
| 3. It is important that I get the COVID-19 jab.a |  |  |  | 0.083 |
| Strongly disagree | 0(0.00) | 0(0.00) | 0(0.00) |  |
| Disagree | 4(1.30) | 2(1.20) | 2(1.42) |  |
| Slightly disagree | 1(0.33) | 0(0.00) | 1(0.71) |  |
| Neither disagree nor agree | 20(6.51) | 6(3.61) | 14(9.93) |  |
| Slightly agree | 18(5.86) | 7(4.22) | 11(7.80) |  |
| Agree | 130(42.35) | 70(42.17) | 60(42.55) |  |
| Strongly agree | 134(43.65) | 81(48.80) | 53(37.59) |  |
| 4. Vaccination greatly reduces my risk of catching COVID-19.a |  |  |  | 0.302 |
| Strongly disagree | 0(0.00) | 0(0.00) | 0(0.00) |  |
| Disagree | 0(0.00) | 0(0.00) | 0(0.00) |  |
| Slightly disagree | 3(0.98) | 0(0.00) | 3(2.13) |  |
| Neither disagree nor agree | 23(7.49) | 10(6.02) | 13(9.22) |  |
| Slightly agree | 22(7.17) | 12(7.23) | 10(7.09) |  |
| Agree | 110(35.83) | 62(37.35) | 48(34.04) |  |
| Strongly agree | 149(48.53) | 82(49.40) | 67(47.52) |  |
| 5. I understand how the flu jab helps my body fight the COVID-19 virus.a |  |  |  | 0.021 |
| Strongly disagree | 7(2.28) | 0(0.00) | 7(4.96) |  |
| Disagree | 2(0.65) | 2(1.20) | 0(0.00) |  |
| Slightly disagree | 6(1.95) | 3(1.81) | 3(2.13) |  |
| Neither disagree nor agree | 38(12.38) | 21(12.65) | 17(12.06) |  |
| Slightly agree | 37(12.05) | 24(14.46) | 13(9.22) |  |
| Agree | 102(33.22) | 61(36.75) | 41(29.08) |  |
| Strongly agree | 115(37.46) | 55(33.13) | 60(42.55) |  |
| 6. The COVID-19 jab plays an important role in protecting my life and that of others. a |  |  |  | <0.0001 |
| Strongly disagree | 1(0.33) | 1(0.60) | 0(0.00) |  |
| Disagree | 2(0.65) | 1(0.60) | 1(0.71) |  |
| Slightly disagree | 4(1.30) | 0(0.00) | 4(2.84) |  |
| Neither disagree nor agree | 30(9.77) | 10(6.02) | 20(14.18) |  |
| Slightly agree | 42(13.68) | 15(9.04) | 27(19.15) |  |
| Agree | 128(41.69) | 65(39.16) | 63(44.68) |  |
| Strongly agree | 100(32.57) | 74(44.58) | 26(18.44) |  |
| 7. I feel under pressure to get the COVID-19 jab.a |  |  |  | <0.0001 |
| Strongly agree | 6(1.95) | 3(1.81) | 3(2.13) |  |
| Agree | 7(2.28) | 4(2.41) | 3(2.13) |  |
| Slightly agree | 17(5.54) | 10(6.02) | 7(4.96) |  |
| Neither disagree nor agree | 28(9.12) | 20(12.05) | 8(5.67) |  |
| Slightly disagree | 18(5.86) | 11(6.63) | 7(4.96) |  |
| Disagree | 134(43.65) | 50(30.12) | 84(59.57) |  |
| Strongly disagree | 97(31.60) | 68(40.96) | 29(20.57) |  |
| 8. The contribution of the COVID-19 jab to my health and well-being is very important.a |  |  |  | <0.0001 |
| Strongly disagree | 0(0.00) | 0(0.00) | 0(0.00) |  |
| Disagree | 3(0.98) | 1(0.60) | 2(1.42) |  |
| Slightly disagree | 5(1.63) | 3(1.81) | 2(1.42) |  |
| Neither disagree nor agree | 42(13.68) | 17(10.24) | 25(17.73) |  |
| Slightly agree | 36(11.73) | 11(6.63) | 25(17.73) |  |
| Agree | 136(44.30) | 71(42.77) | 65(46.10) |  |
| Strongly agree | 85(27.69) | 63(37.95) | 22(15.60) |  |
| 9. I can choose whether to get a COVID-19 jab or not.a |  |  |  | <0.0001 |
| Strongly disagree | 2(0.65) | 1(0.60) | 1(0.71) |  |
| Disagree | 4(1.30) | 2(1.20) | 2(1.42) |  |
| Slightly disagree | 5(1.63) | 1(0.60) | 4(2.84) |  |
| Neither disagree nor agree | 10(3.26) | 5(3.01) | 5(3.55) |  |
| Slightly agree | 21(6.84) | 6(3.61) | 15(10.64) |  |
| Agree | 150(48.86) | 64(38.55) | 86(60.99) |  |
| Strongly agree | 115(37.46) | 87(52.41) | 28(19.86) |  |
| 10. How the COVID-19 jab works to protect my health is a mystery to me.a |  |  |  | <0.0001 |
| Strongly agree | 41(13.36) | 4(2.41) | 37(26.24) |  |
| Agree | 71(23.13) | 8(4.82) | 63(44.68) |  |
| Slightly agree | 24(7.82) | 15(9.04) | 9(6.38) |  |
| Neither disagree nor agree | 40(13.03) | 31(18.67) | 9(6.38) |  |
| Slightly disagree | 20(6.51) | 15(9.04) | 5(3.55) |  |
| Disagree | 59(19.22) | 50(30.12) | 9(6.38) |  |
| Strongly disagree | 52(16.94) | 43(25.90) | 9(6.38) |  |
| 11. I get the COVID-19 jab only because I am required to do so.a |  |  |  | 0.003 |
| Strongly agree | 4(1.30) | 2(1.20) | 2(1.42) |  |
| Agree | 11(3.58) | 7(4.22) | 4(2.84) |  |
| Slightly agree | 12(3.91) | 7(4.22) | 5(3.55) |  |
| Neither disagree nor agree | 23(7.49) | 16(9.64) | 7(4.96) |  |
| Slightly disagree | 25(8.14) | 13(7.83) | 12(8.51) |  |
| Disagree | 133(43.32) | 54(32.53) | 79(56.03) |  |
| Strongly disagree | 99(32.25) | 67(40.36) | 32(22.70) |  |
| 12. Getting the COVID-19 jab has a positive influence on my health.a |  |  |  | <0.0001 |
| Strongly disagree | 33(10.75) | 25(15.06) | 8(5.67) |  |
| Disagree | 22(7.17) | 17(10.24) | 5(3.55) |  |
| Slightly disagree | 12(3.91) | 7(4.22) | 5(3.55) |  |
| Neither disagree nor agree | 44(14.33) | 21(12.65) | 23(16.31) |  |
| Slightly agree | 30(9.77) | 8(4.82) | 22(15.60) |  |
| Agree | 113(36.81) | 49(29.52) | 64(45.39) |  |
| Strongly agree | 53(17.26) | 39(23.49) | 14(9.93) |  |

**Notes:** a number (percentage), b median (IQR), cMean ± SD
